# Supplementary material for: Jute stick derived self-regenerating sustainable solar evaporators with different salt mitigation mechanisms for highly efficient solar desalination
Source: Royal Society of Chemistry journal article supplement (doi:10.1039/d2ta08237c), 2023-01-01
Supplement: d2ta08237c1.pdf [file d2ta08237c1.pdf]

Supplementary information

# **Jute Stick Derived Self-regenerating Sustainable Solar Evaporators with Different Salt Mitigation Mechanisms for Highly Efficient Solar Desalination**

Md. Nahian Al Subri Ivan <sup>a,c</sup>, Ahmed Mortuza Saleque <sup>a,c</sup>, Safayet Ahmed <sup>a,c</sup>, Zong  
Liang Guo <sup>a,c</sup>, Di Zu <sup>a,c</sup>, Linli Xu<sup>b,c</sup>, Tawsif Ibne Alam <sup>a,c</sup>, Sumaiya Umme Hani <sup>a,c</sup> ,  
Yuen Hong Tsang <sup>a,c,\*</sup>

a.) Department of Applied Physics, Photonic Research Institute, and Materials  
Research Center, The Hong Kong Polytechnic University, Hung Hom, Kowloon,  
Hong Kong

b.) Department of Applied Biology and Chemical Technology and Research Institute  
for Smart Energy, The Hong Kong Polytechnic University, Hung Hom, Kowloon,  
Hong Kong

c.) Shenzhen Research Institute, The Hong Kong Polytechnic University, 518057  
Shenzhen, Guangdong, People's Republic of China

\*) Corresponding author: [yuen.tsang@polyu.edu.hk](mailto:yuen.tsang@polyu.edu.hk)

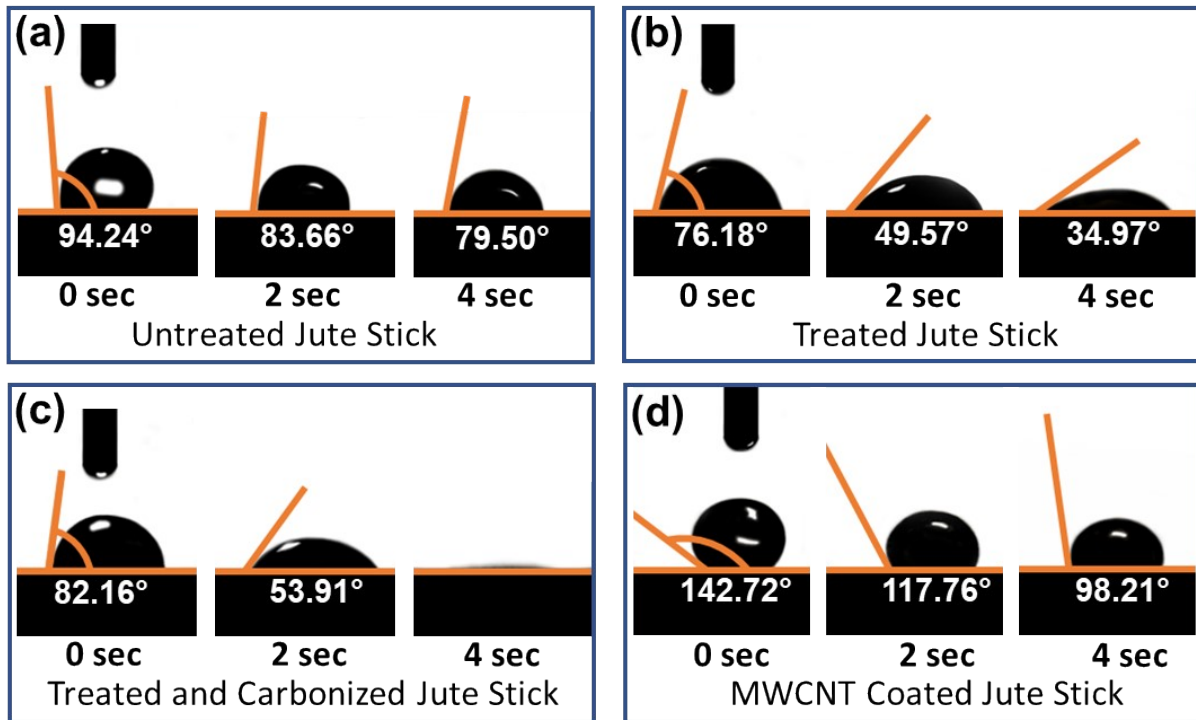

**Fig. S1:** Wettability of the surfaces. a) Untreated JS. b) Treated JS (PJS). c) Treated and Carbonized JS (CJS) d) MWCNT coated JS (MJS)

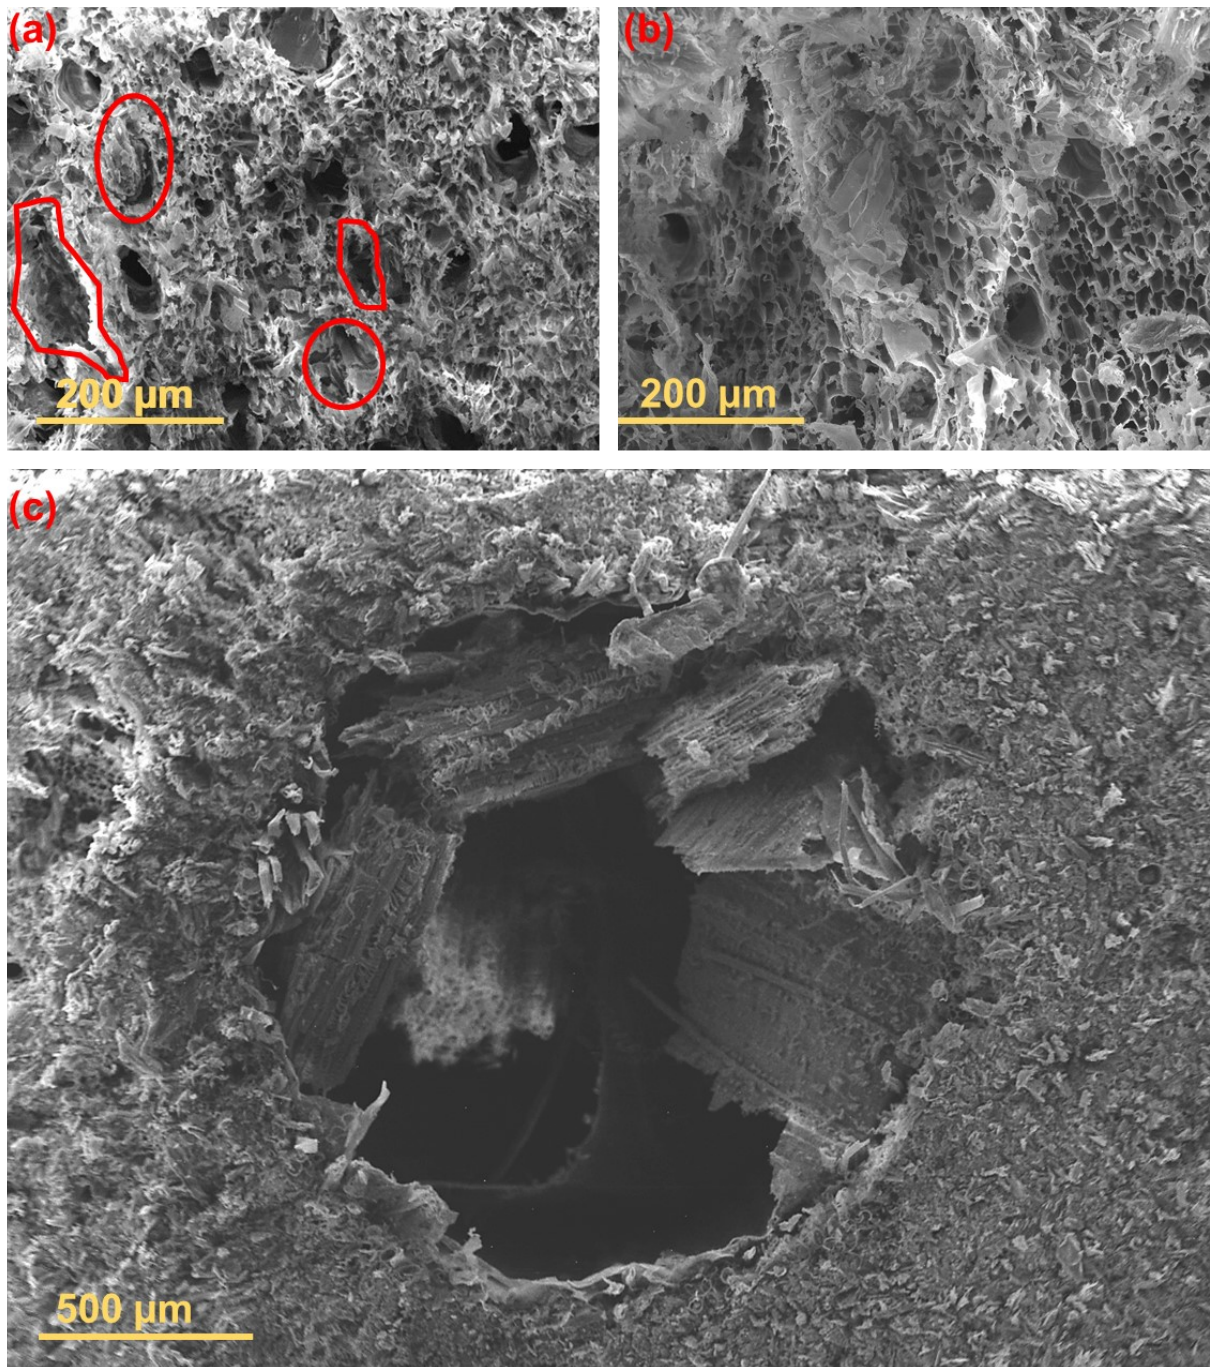

**Fig. S2:** Surface morphology of JS. SEM image of a) Carbonized JS surface (Hot plate carbonization) showing the micro-cracks caused by uneven heating. b) Carbonized JS surface (carbonization by even heating in the presence of Argon (Ar)). c) Untreated and uncleaned JS with central natural hole of  $\approx 1.6$  mm diameter.

## **Supplementary Note 1:**

### **Effect on surface morphology due to carbonization by even and uneven heating:**

In this article hot plate carbonization technique was adopted to carbonize the alkali treated JS for fabricating the solar absorbing surface. The alkali treated JS pieces were kept on the top of preheated (400 °C) hotplate for 14 minutes. As the JS has low thermal conductivity, the temperature of one surface (in contact with hot plate) became very high than another surface which causes micro-cracks on the solar absorbing surface of carbonised JS evaporators as shown in Fig. S2a. For further verification some JS pieces were carbonised inside a tube furnace in the presence of Argon (Ar). The temperature of the tube was increased very slowly (15 °C/min to reach 400 °C) for even heating of JS and kept at that temperature for 10 minutes and after that it was cooled to room temperature very slowly in the presence of Ar. Fig. S2b shows the surface morphology of carbonized JS (evenly heated) where such microcracks were not observed. However due to long exposure to heat and total carbonization of JS, these samples became soft and difficult to handle during solar evaporation experiment and hence these samples were only used for morphology comparison.

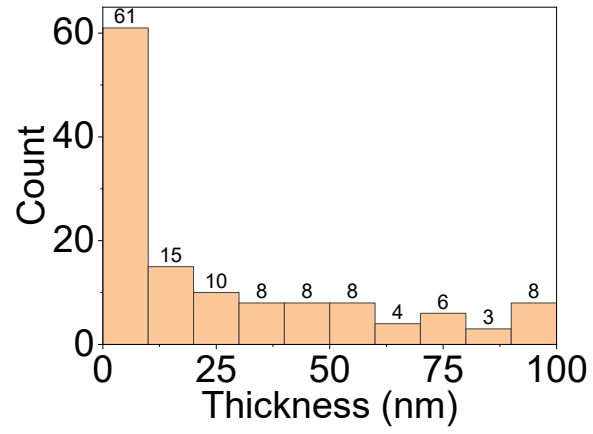

**Fig. S3:** Statistical distribution of the thickness of 131 particles found after 8 hours of ultrasonication of MWCNT in IPA

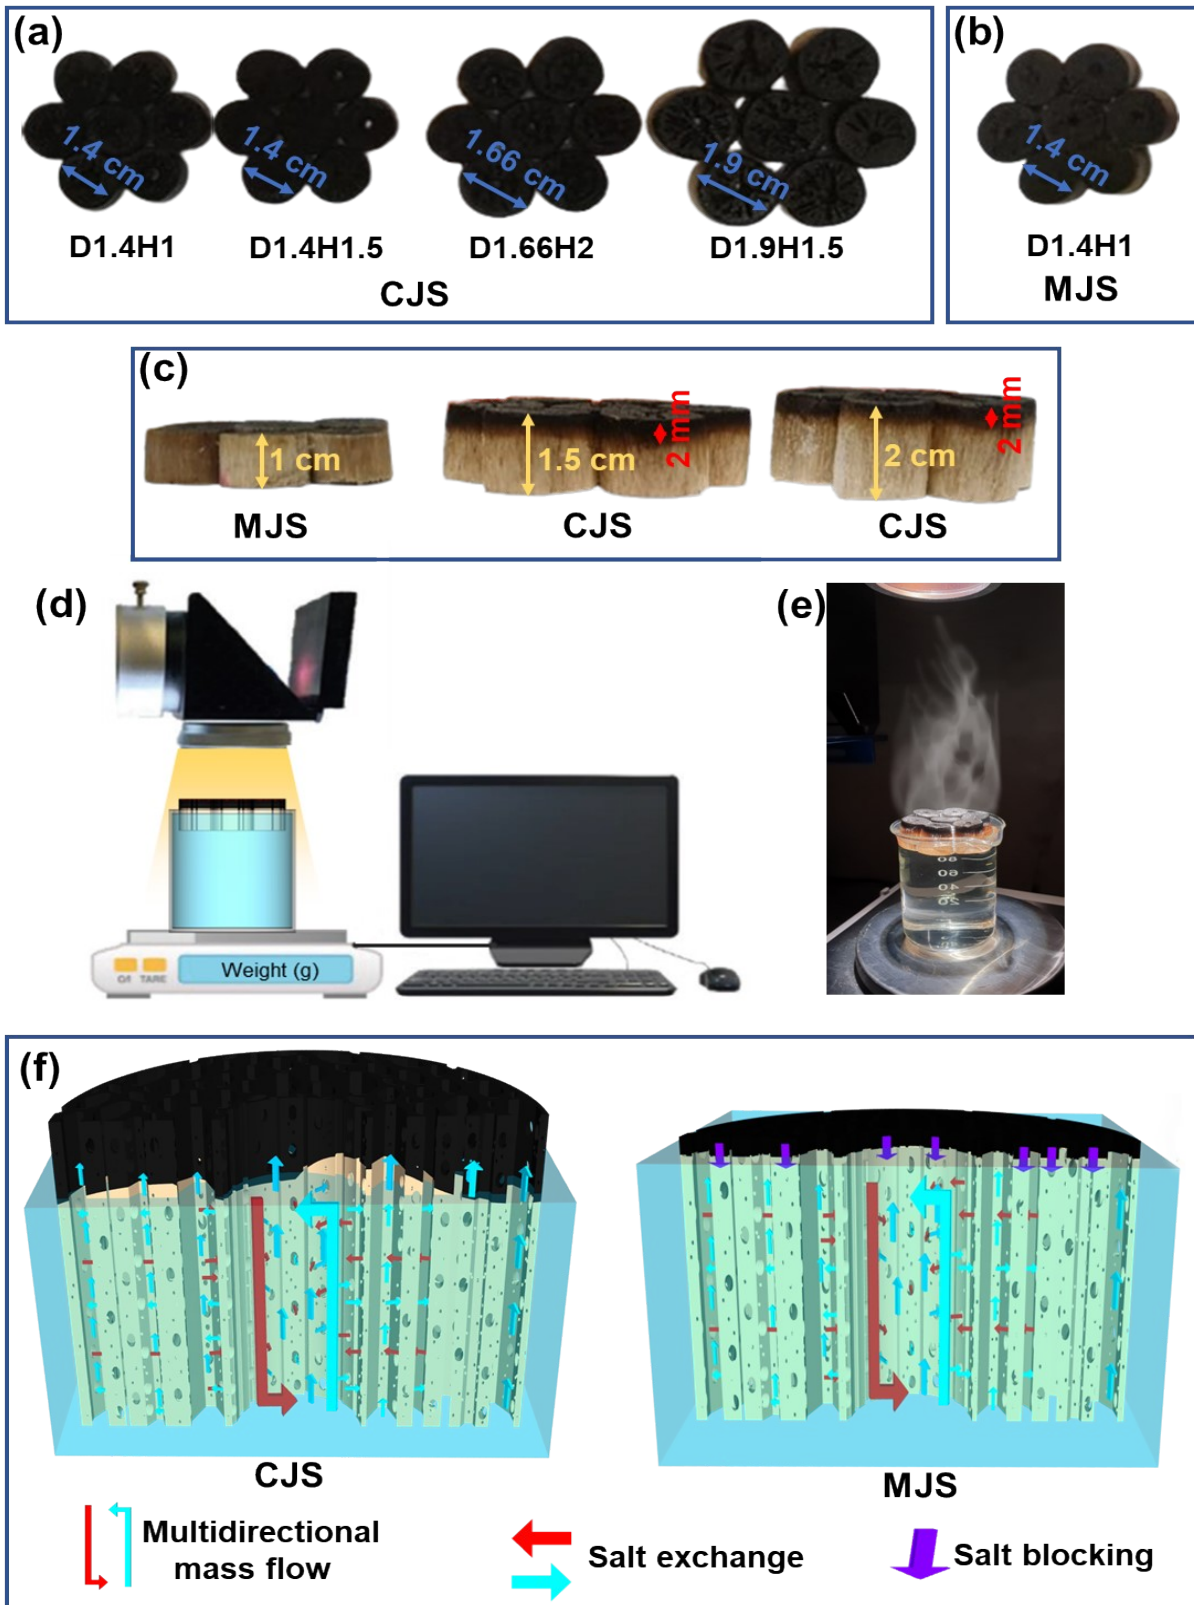

**Fig. S4:** Dimensions of the evaporators. a) Dimensions of CJS. b) Dimension of MJS. c) Image of 3 different thicknesses of the evaporators d) Schematic illustration of experimental set up e) illustration of steam generation. f) Salt mitigation mechanism of CJS and MJS.

## Supplementary note 2

Dimensions of the evaporators:

Jute Stick (JS) has been cut horizontally to the growth direction at different vertical position of JS to get evaporators of different diameters and thicknesses. Initially 4 carbonized CJS arrays of 3 different diameters and 3 different thicknesses were made. 7 JS pieces with diameter of 1.4 cm and thickness of 1 cm are carbonized together and grouped in a hexagonal arrangement to make CJS\_D1.4H1. It should be noted that the diameter and thickness of each JS pieces is 1.4 cm and 1 cm respectively and hence while naming the CJS evaporators, diameter and thickness of each piece are considered. Similarly, 7 JS pieces with diameter of 1.4 cm and thickness of 1.5 cm are carbonized and grouped together to make CJS\_D1.4H1.5. Same procedure was followed for making CJS\_D1.66H2 and CJS\_D1.9H1.5. The average diameters of the central natural hole of each jute stick were 2.5 mm for CJS\_D1.4H1 and CJS\_D1.4H1.5 and 4 mm for CJS\_D1.66H2 and CJS\_D1.9H1.5 after cleaning and drying and carbonizing. For preparing MJS 7 JS pieces with diameter of 1.4 cm and thickness of 1 cm was used. The diameter of the natural hole of each JS pieces of MJS was 2.5 mm after cleaning and drying.

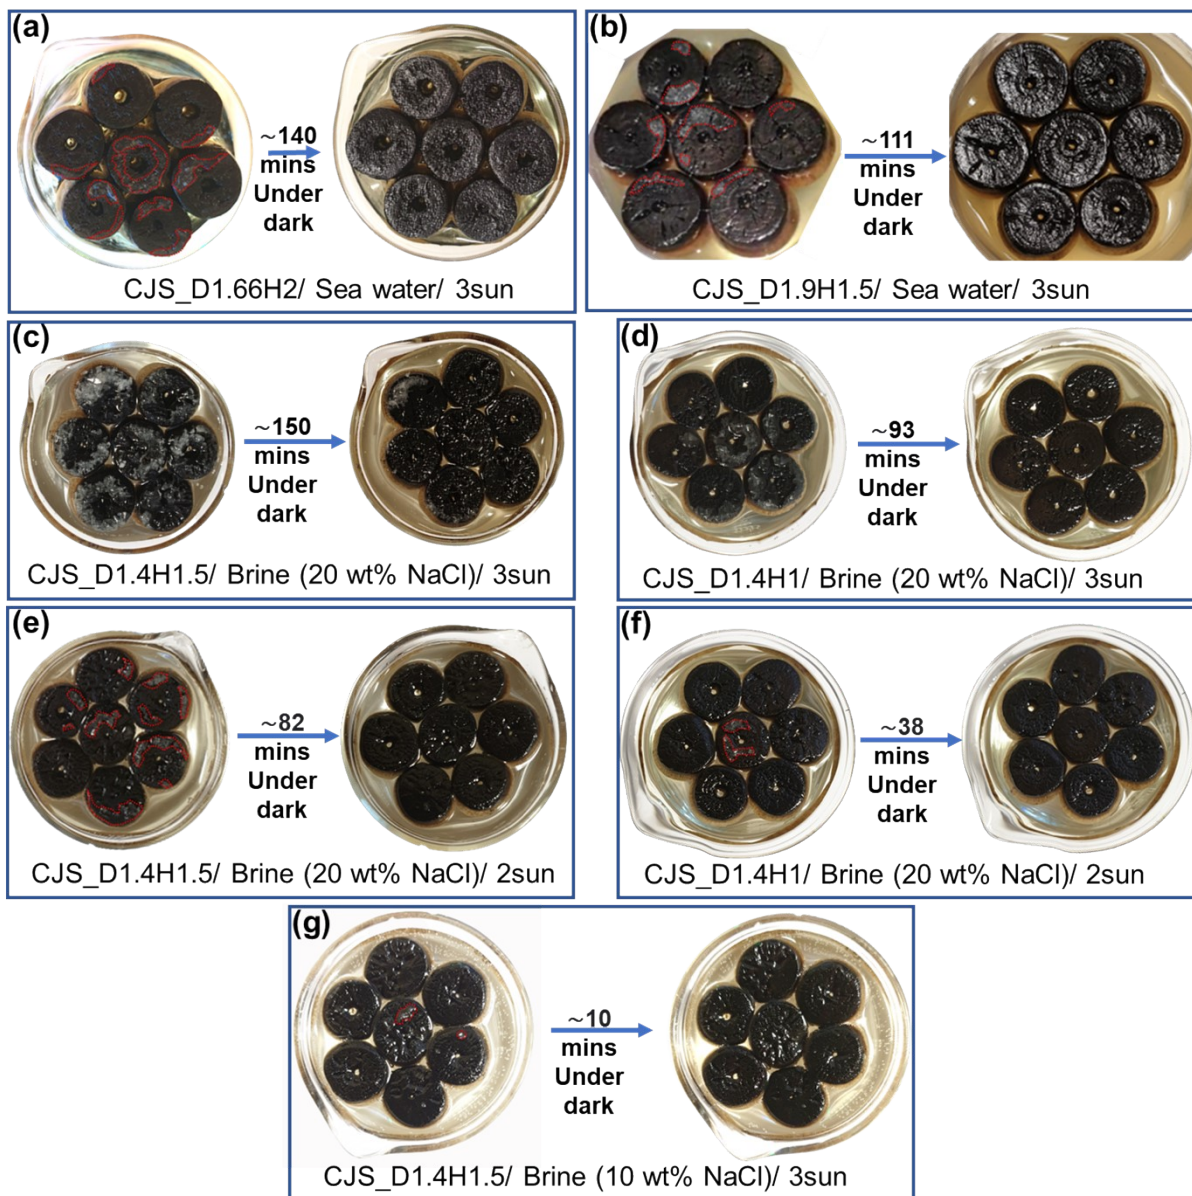

**Fig. S5:** Accumulated salt rejection time for different CJS evaporators. a) Accumulated salt on the top surface of CJS\_D1.66H2 after 1 hour of seawater evaporation under 3 sun and rejection of the accumulated salt under dark condition. b) Accumulated salt on the top surface of CJS\_D1.9H1.5 after 1 hour of seawater evaporation under 3 sun and rejection of the accumulated salt under dark condition. c-d) Accumulated salt on the top surface of CJS\_D1.4H1.5 and CJS\_D1.4H1 after 1 hour of brine water (20 wt% NaCl) evaporation under 3 sun and rejection of the accumulated salt under dark condition. e-f) accumulated salt on the top surface of CJS\_D1.4H1.5 and CJS\_D1.4H1 after 1 hour of brine water (20 wt% NaCl) evaporation under 2 sun and rejection of the accumulated salt under dark condition. g) accumulated salt on the top surface of CJS\_D1.4H1.5 after 1 hour of brine water (10 wt% NaCl) evaporation under 3 sun and rejection of the accumulated salt under dark condition.



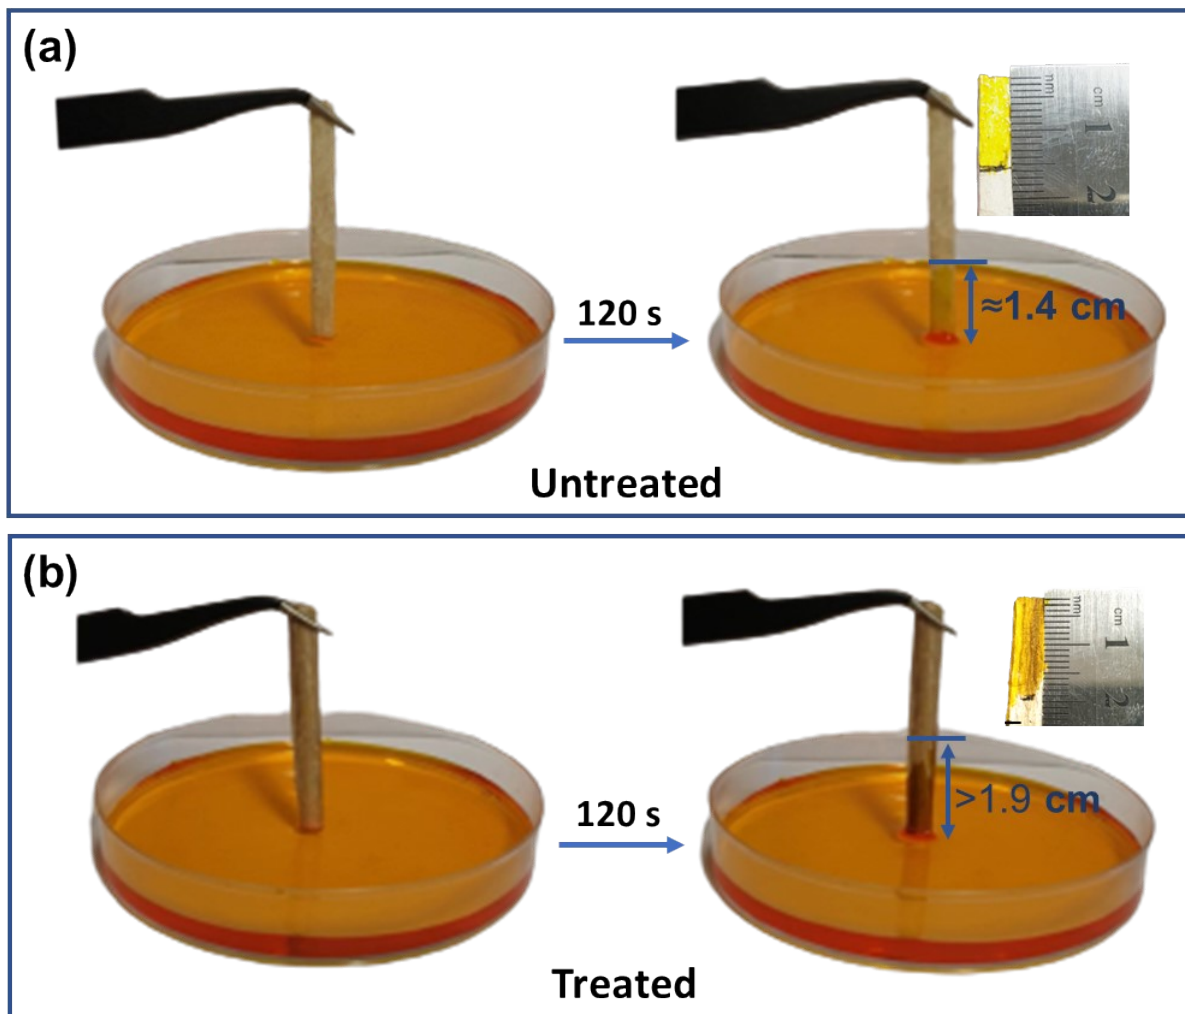

Fig. S6: Water Uptake experiment a) Untreated JS b) NaOH Treated JS

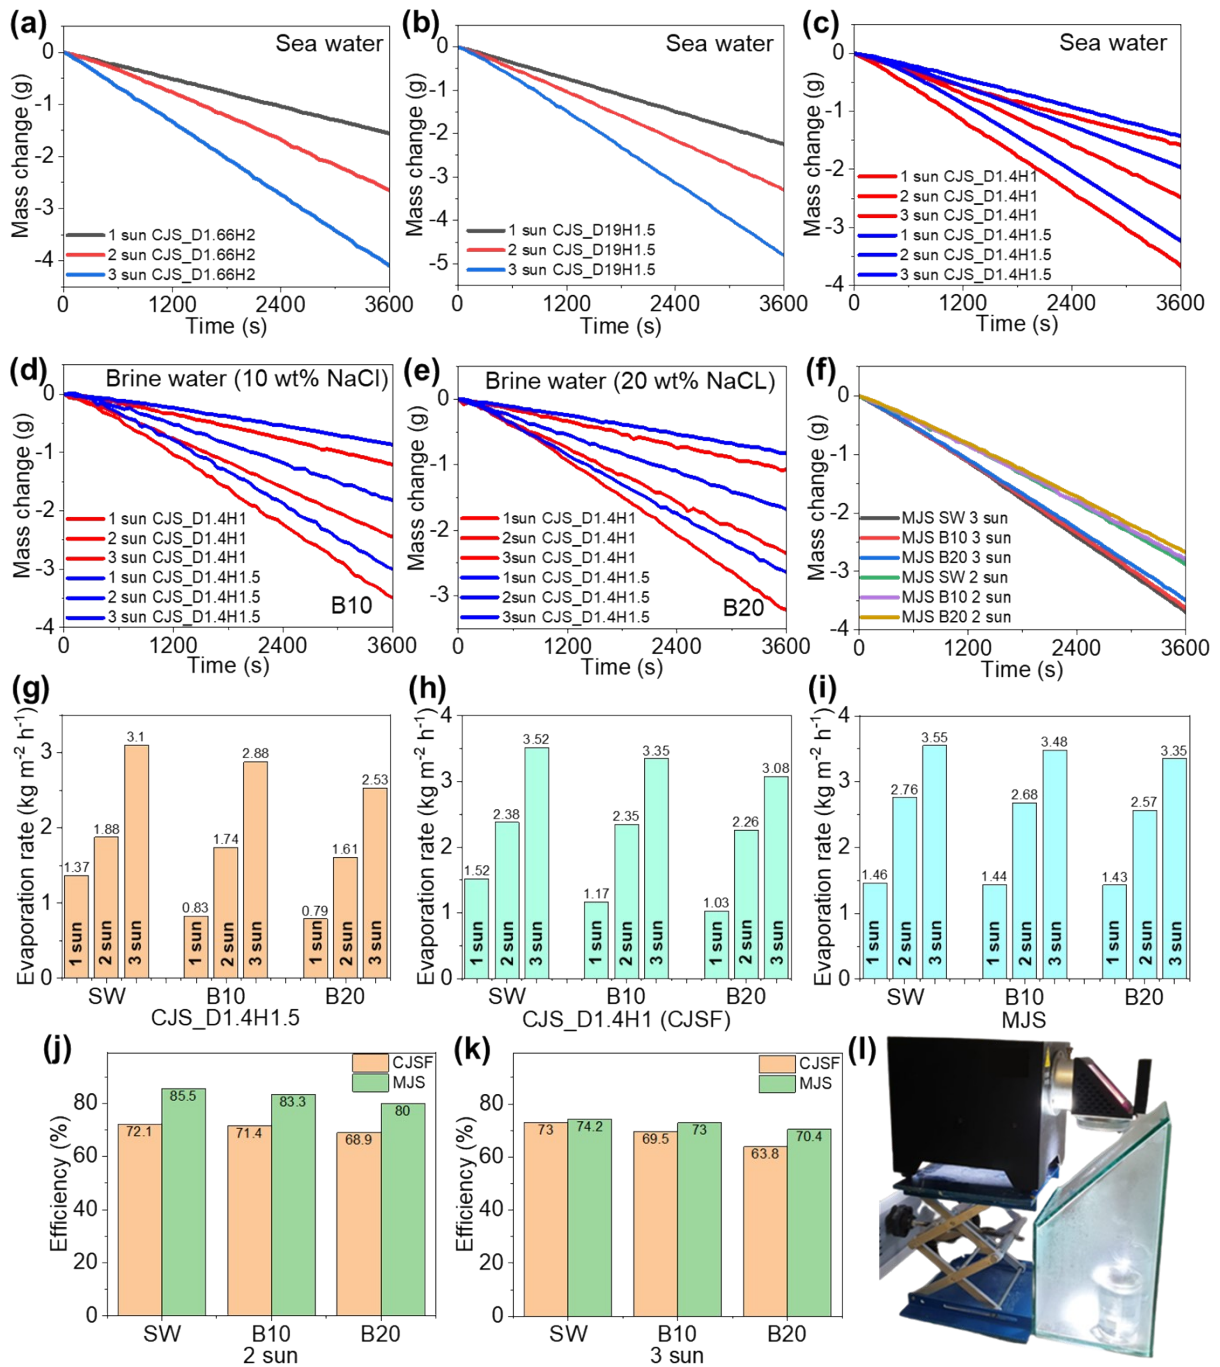

**Fig. S7:** Mass change rate evaporation rate and efficiency of different solar evaporators. a) Mass change rate of sea water (SW) in the presence of CJS\_D1.66H2 under different solar illumination. b) Mass change rate of sea water (SW) in the presence of CJS\_D1.9H1.5 under different solar illumination. c) Mass change rate of sea water (SW) in the presence of CJS\_D1.4H1 and CJS\_D1.4H1.5 under different solar illumination. d) Mass change rate of 10 wt% NaCl Concentrated Brine water (B10) in the presence of CJS\_D1.4H1 and CJS\_D1.4H1.5 under different solar illumination. e) Mass change rate of 20 wt% NaCl Concentrated Brine water (B20) in the presence of CJS\_D1.4H1 and CJS\_D1.4H1.5 under different solar illumination. f) Mass change rate of SW, B10, B20 in the presence of MJS under different solar irradiation (2 sun and 3 sun). g-i) Evaporation rate of SW, B10 and B20 in the presence of CJS\_D1.4H1.5, CJS\_D1.4H1 (CJSF) and MJS under different solar irradiation. j-k) Efficiency (%) of SW, B10 and B20 in the presence of CJSF and MJS under different solar irradiation. l) Photograph of the experimental setup.

Efficiency of CJSF and MJS in evaporating SW, B10 and B20 under different solar irradiation (2 sun and 3 sun). I) Image of generation and condensation of vapor.

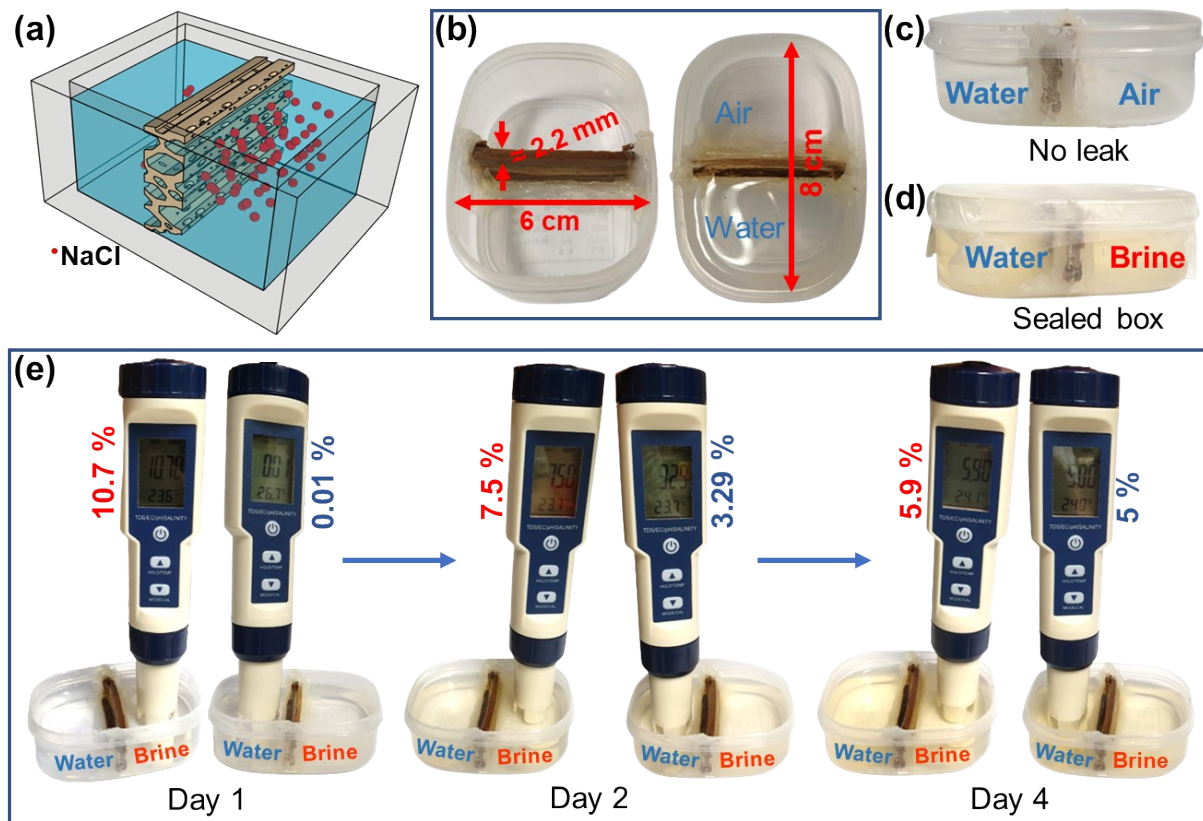

**Fig. S8:** Experiment on lateral salt transfer through pits. a) schematic illustration of lateral salt transfer through pit. b) System used for experimentation. c) checking water leakage from the sides of JS segment. d) Sealed box containing tap water (salinity 0.01%) on one side and brine water (salinity 10.7%) on another side. e) salinity measurement.

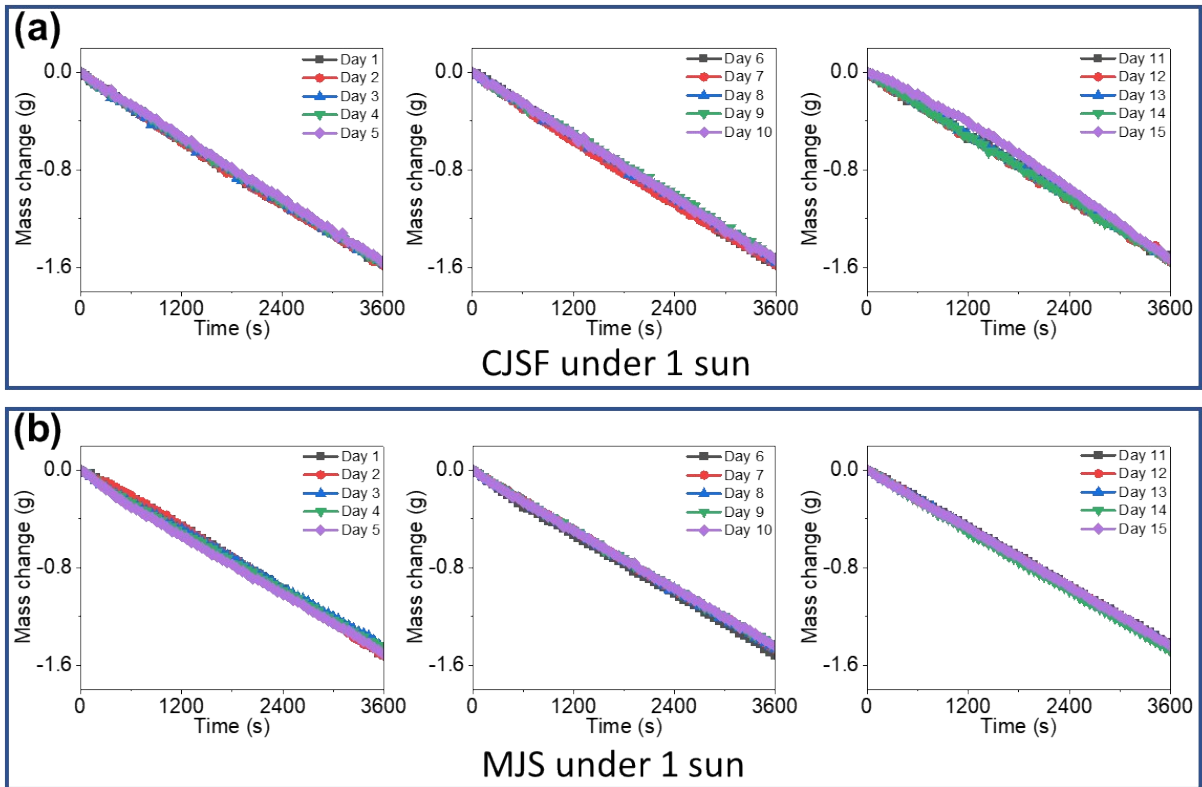

**Fig. S9:** Mass change data for 15 consecutive days (runtime of 1 hour) of operation for a) CJSF and b) MJS.

### Supplementary note 3

#### Evaporation rate and Efficiency calculation:

The evaporation rate,  $m_e$  can be calculated by following equation:

$$m_{ev} = \frac{m_h}{A} \quad (1)$$

Where,  $m_h$  is mass loss of water per hour due to evaporation and  $A$  is the area of evaporation surface.

The efficiency can be calculated by

$$\eta_s = \frac{m_l (H_{lv} + Q)}{E_i} \quad (2)$$

$$H_{lv} = 1.91846 * 10^6 * [T_a / (T_a - 33.91)]^2 \quad (3)$$

$$Q = c * (T_a - T_i) \quad (4)$$

Where,  $m_l$  = net evaporation rate ( $\text{kg m}^{-2}$ ),

$$m_l = m_{ev} - m_{dr} \quad (5)$$

In these equations

$m_{dr}$  = dark evaporation rate

$E_i$  = energy input of the incident light ( $\text{kJ m}^{-2}\text{h}^{-1}$ ),

$H_{lv}$  = is the latent heat required for vaporization of water ( $\text{J kg}^{-1}$ ),

$T_a$  = is the average temperature of the solar evaporation surface (K),

$Q$  = is the required heat for increasing the temperature of water,

$c$  = is the specific heat of water ( $4.2 \text{ J g}^{-1} \text{ K}^{-1}$ ),

$T_i$  = initial average temperature of top surface (K)

For CJSF evaporator under 1 sun illumination,  $T_a \approx 309.5 \text{ K}$ ,  $T_i \approx 296.6 \text{ K}$ ,  $m_{ev} \approx 1.52 \text{ kg m}^{-2} \text{ h}^{-1}$ ,  $m_{dr} \approx 0.24 \text{ kg m}^{-2} \text{ h}^{-1}$ , Hence, from the above-mentioned equations the efficiency becomes  $\approx 86.19\%$  for water. For sea water efficiency is  $\approx 87.01\%$  as  $m_{dr} \approx 0.22 \text{ kg m}^{-2} \text{ h}^{-1}$ .

For MJS evaporator under 1 sun illumination,  $T_a \approx 307.8 \text{ K}$ ,  $T_i \approx 296.6 \text{ K}$ ,  $m_{ev} \approx 1.46 \text{ kg m}^{-2} \text{ h}^{-1}$ ,  $m_{dr} \approx 0.24 \text{ kg m}^{-2} \text{ h}^{-1}$ , Hence, from the above-mentioned equations the efficiency becomes  $\approx 81.94\%$  for water. For sea water efficiency is  $\approx 84.39\%$  as  $m_{dr} \approx 0.20 \text{ kg m}^{-2} \text{ h}^{-1}$ .

#### **Supplementary note 4:**

##### **Standard deviation in evaporation rate**

The standard deviation of the evaporation rate of tap water and sea water were calculated using the following equation:

$$\sigma = \sqrt{\frac{\sum (x_i - \mu)^2}{N}}$$

(6)

Here,

$\sigma$  = The population standard deviation

$x_i$  = Each value from the total population

$\mu$  = Mean of the population

N =Size of the population

### Supplementary note 5

#### Mass water absorption

$$a_{mw} (\%) = \frac{m_{wet} - m_{dry}}{m_{dry}} \times 100 \quad (7)$$

Here,

$m_{wet}$  = mass of wet evaporator (CJSF) after submerged in water for 20 minutes = 6.122g

$m_{dry}$  = mass of the dry evaporator (CJSF) = 2.038g

Hence from above equation mass water absorption after 20 minutes = 200.39%

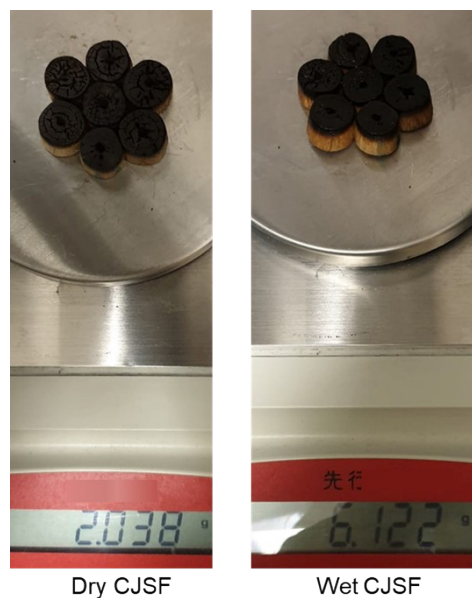

**Fig. S10:** Mass of dry and wet evaporator.

**Table ST:** The efficiency, evaporation rate and comments on different biomass based Solar Evaporator.

| Evaporator                                                                   | Evaporation rate (kg m <sup>-2</sup> h <sup>-1</sup> ) | Efficiency (%) | Type of water                                                      | Ref. |
|------------------------------------------------------------------------------|--------------------------------------------------------|----------------|--------------------------------------------------------------------|------|
| Carbonized Mushroom                                                          | 1.475                                                  | 78             | Water under 1 sun                                                  | 1    |
| Carbonised basswood blocks (Mechanically modified by drilling)               | 1.04                                                   | ≈ 75           | 20 wt% NaCl Concentrated brine water under 1 sun                   | 2    |
| Bamboo charcoal                                                              | 1.191                                                  | 84             | Salt water (3.5 wt%) under 1 sun                                   | 3    |
| Janus Pomelo Peel with MXene                                                 | ≈1.48                                                  | ≈92.3          | Water and 3.5 wt% NaCl concentrated water Under 1 sun illumination | 4    |
| Chinese ink coated mechanically modified (by drilling)                       | ≈ 1.6                                                  | 74             | 3.5% NaCl concentrated water under 1 sun                           | 5    |
| Reduced graphene oxide/ silver/wood                                          | 3.920                                                  | 92.91          | Sea water under 3 suns                                             | 6    |
| Carbonized daikon                                                            | 1.57                                                   | 85.9           | Water under 1 sun                                                  | 7    |
| Carbonized 3D Platanus Fruit                                                 | 2                                                      | 81.3           | Water under 1 sun                                                  | 8    |
| Fe <sub>3</sub> O <sub>4</sub> /polyvinyl alcohol decorated delignified wood | ≈1.3                                                   | ≈73            | 3.5 - 20 wt% NaCl Concentrated water under 1 sun                   | 9    |
| Carbonized Food Waste (rice, potato, banana peel, Pasta, Lotus root)         | ≈1.34 for Pasta (best performance)                     | ≈ 84.1         | water of 3.5 wt% salinity under 1 sun                              | 10   |
| All biomass-based squid ink-starch hydrogel                                  | ≈ 1.94                                                 | -              | 3.5 wt% salt water under 1 sun                                     | 11   |
| Surface-carbonized bimodal porous                                            | ≈ 0.8                                                  | 57             | 15 wt% NaCl concentrated water under 1 sun                         | 12   |



|                  |      |        |                                                                        |           |
|------------------|------|--------|------------------------------------------------------------------------|-----------|
| wood membrane    |      |        |                                                                        |           |
| Polypyrrole-wood | 1.32 | ≈ 83   | Simulated sea water of 3.5 wt% salinity under 1 sun                    | 13        |
| CJS              | 1.52 | 87.01% | Natural seawater (salinity of 2.98% with other impurities) under 1 sun | This work |
| MJS              | 1.46 | 84.39% | Natural Seawater under 1 sun                                           |           |
| MJS              | 1.44 | 84.13% | 10 wt% NaCl concentrated brine water under 1 sun.                      |           |
| MJS              | 1.43 | 84.07% | 20 wt% NaCl concentrated brine water under 1 sun.                      |           |

## References

- 1 N. Xu, X. Hu, W. Xu, X. Li, L. Zhou, S. Zhu and J. Zhu, *Adv. Mater.*, 2017, **29**, 1606762.
- 2 Y. Kuang, C. Chen, S. He, E. M. Hitz, Y. Wang, W. Gan, R. Mi and L. Hu, *Adv. Mater.*, 2019, **31**, 1900498.
- 3 Z. Li, C. Wang, T. Lei, H. Ma, J. Su, S. Ling and W. Wang, *Adv. Sustain. Syst.*, 2019, **3**, 1–10.
- 4 H.-S. Guan, T.-T. Fan, H.-Y. Bai, Y. Su, Z. Liu, X. Ning, M. Yu, S. Ramakrishna and Y.-Z. Long, *Carbon N. Y.*, 2022, **188**, 265–275.
- 5 X. F. Zhang, Z. Wang, L. Song, Y. Feng and J. Yao, *Desalination*, 2020, **496**, 114727.
- 6 A. Ebrahimi, E. K. Goharshadi and M. Mohammadi, *Mater. Chem. Phys.*, 2022, **275**, 125258.
- 7 M. Zhu, J. Yu, C. Ma, C. Zhang, D. Wu and H. Zhu, *Sol. Energy Mater. Sol. Cells*, 2019, **191**, 83–90.
- 8 B. Yuan, C. Zhang, Y. Liang, L. Yang, H. Yang, L. Bai, D. Wei, W. Wang, Q. Wang and H. Chen, *Adv. Sustain. Syst.*, 2021, **5**, 2000245.
- 9 L. Song, X. F. Zhang, Z. Wang, T. Zheng and J. Yao, *Desalination*, 2021, **507**, 115024.
- 10 Y. Zhang, S. K. Ravi and S. C. Tan, *Nano Energy*, 2019, **65**, 104006.

- 11 Y. Xu, X. Xiao, X. Fan, Y. Yang, C. Song, Y. Fan and Y. Liu, *J. Mater. Chem. A*, 2020, **8**, 24108–24116.
- 12 S. He, C. Chen, Y. Kuang, R. Mi, Y. Liu, Y. Pei, W. Kong, W. Gan, H. Xie, E. Hitz, C. Jia, X. Chen, A. Gong, J. Liao, J. Li, Z. J. Ren, B. Yang, S. Das and L. Hu, *Energy Environ. Sci.*, 2019, **12**, 1558–1567.
- 13 W. Huang, G. Hu, C. Tian, X. Wang, J. Tu, Y. Cao and K. Zhang, *Sustain. Energy Fuels*, 2019, **3**, 3000–3008.
